# Supplementary material
Source: publisher figshare collection journal article supplement (https://frontiersin.figshare.com/ndownloader/files/30920491)
Supplement: Supplementary file 1 [file 30920491]

**Supplementary Material 1.** Description of search strings used for literature search on TAV seed systems

1. (“seed system*” OR “farmer-led seed enterprise*” OR “quality declared seed” OR “community-based seed system*” OR “informal seed system*” OR “vegetable* seed* business*”) AND (“traditional vegetable*”)
2. (“seed system*” OR “farmer-led seed enterprise*” OR “quality declared seed” OR “community-based seed system*” OR “informal seed system*” OR “vegetable* seed* business*”) AND (“traditional african vegetable*”)
3. (“seed system*” OR “farmer-led seed enterprise*” OR “quality declared seed” OR “community-based seed system*” OR “informal seed system*” OR “vegetable* seed* business*”) AND (“traditional leafy vegetable*”)
4. (“seed system*” OR “farmer-led seed enterprise*” OR “quality declared seed” OR “community-based seed system*” OR “informal seed system*” OR “vegetable* seed* business*”) AND (“indigenous vegetable*”)
5. (“seed system*” OR “farmer-led seed enterprise*” OR “quality declared seed” OR “community-based seed system*” OR “informal seed system*” OR “vegetable* seed* business*”) AND (“neglected vegetable*”)
6. (“seed system*” OR “farmer-led seed enterprise*” OR “quality declared seed” OR “community-based seed system*” OR “informal seed system*” OR “vegetable* seed* business*”) AND (“underutilized vegetable*”)
7. (“seed system*” OR “farmer-led seed enterprise*” OR “quality declared seed” OR “community-based seed system*” OR “informal seed system*” OR “vegetable* seed* business*”) AND (“vegetable landrace*”)
8. (“seed system*” OR “farmer-led seed enterprise*” OR “quality declared seed” OR “community-based seed system*” OR “informal seed system*” OR “seed* business*”) AND (“vegetable*”)
